# Supplementary material
Source: MDPI journal article supplement (https://www.mdpi.com/2073-4395/12/11/2640)
Supplement: s1 [file s1]

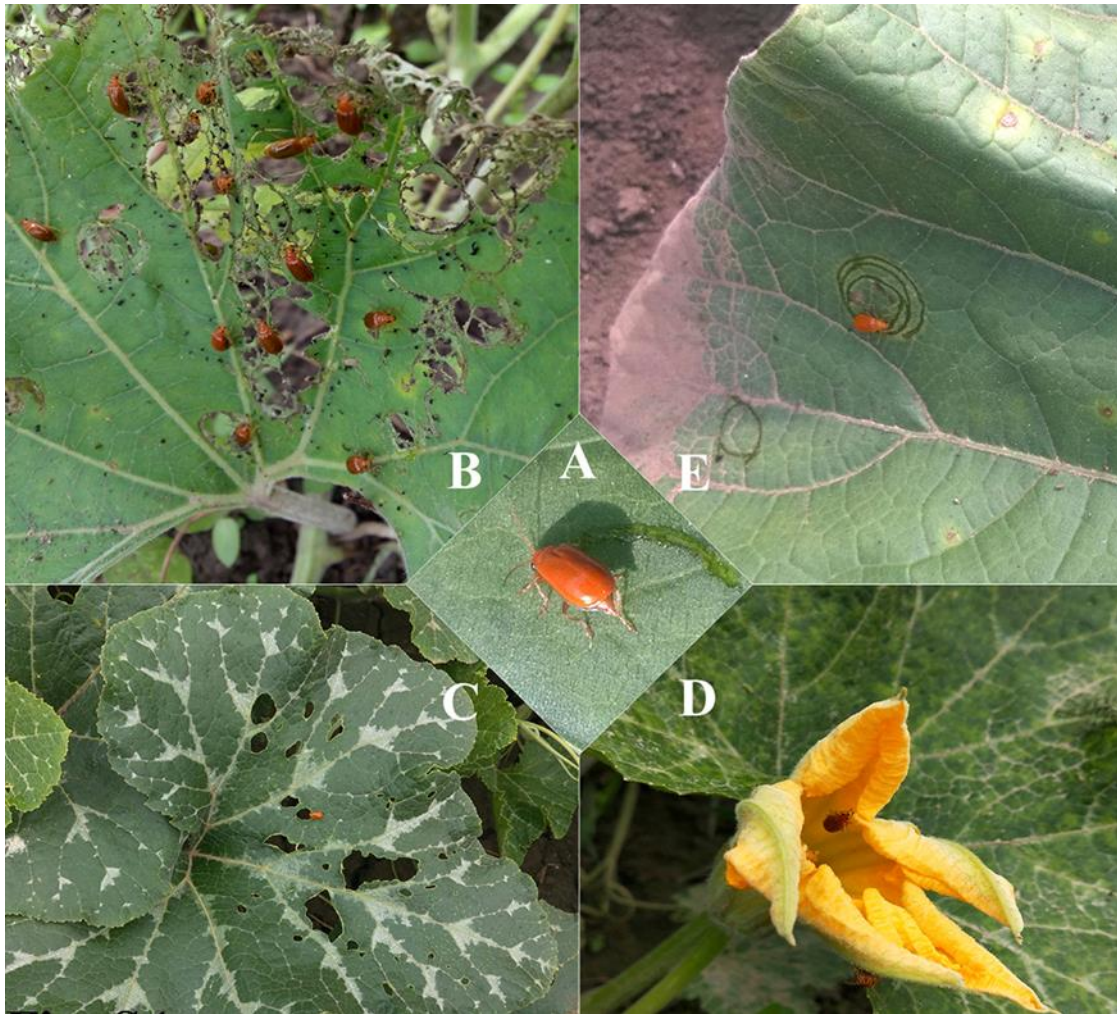

**Figure S1. Images of (A) Adult *Aulacophora foveicollis* Lucas (Coleoptera: Chrysomelidae). (B), (C) and (D) damaged leaves and flower of *Cucurbita maxima*. (E) Trench feeding behavior shown by the pest**



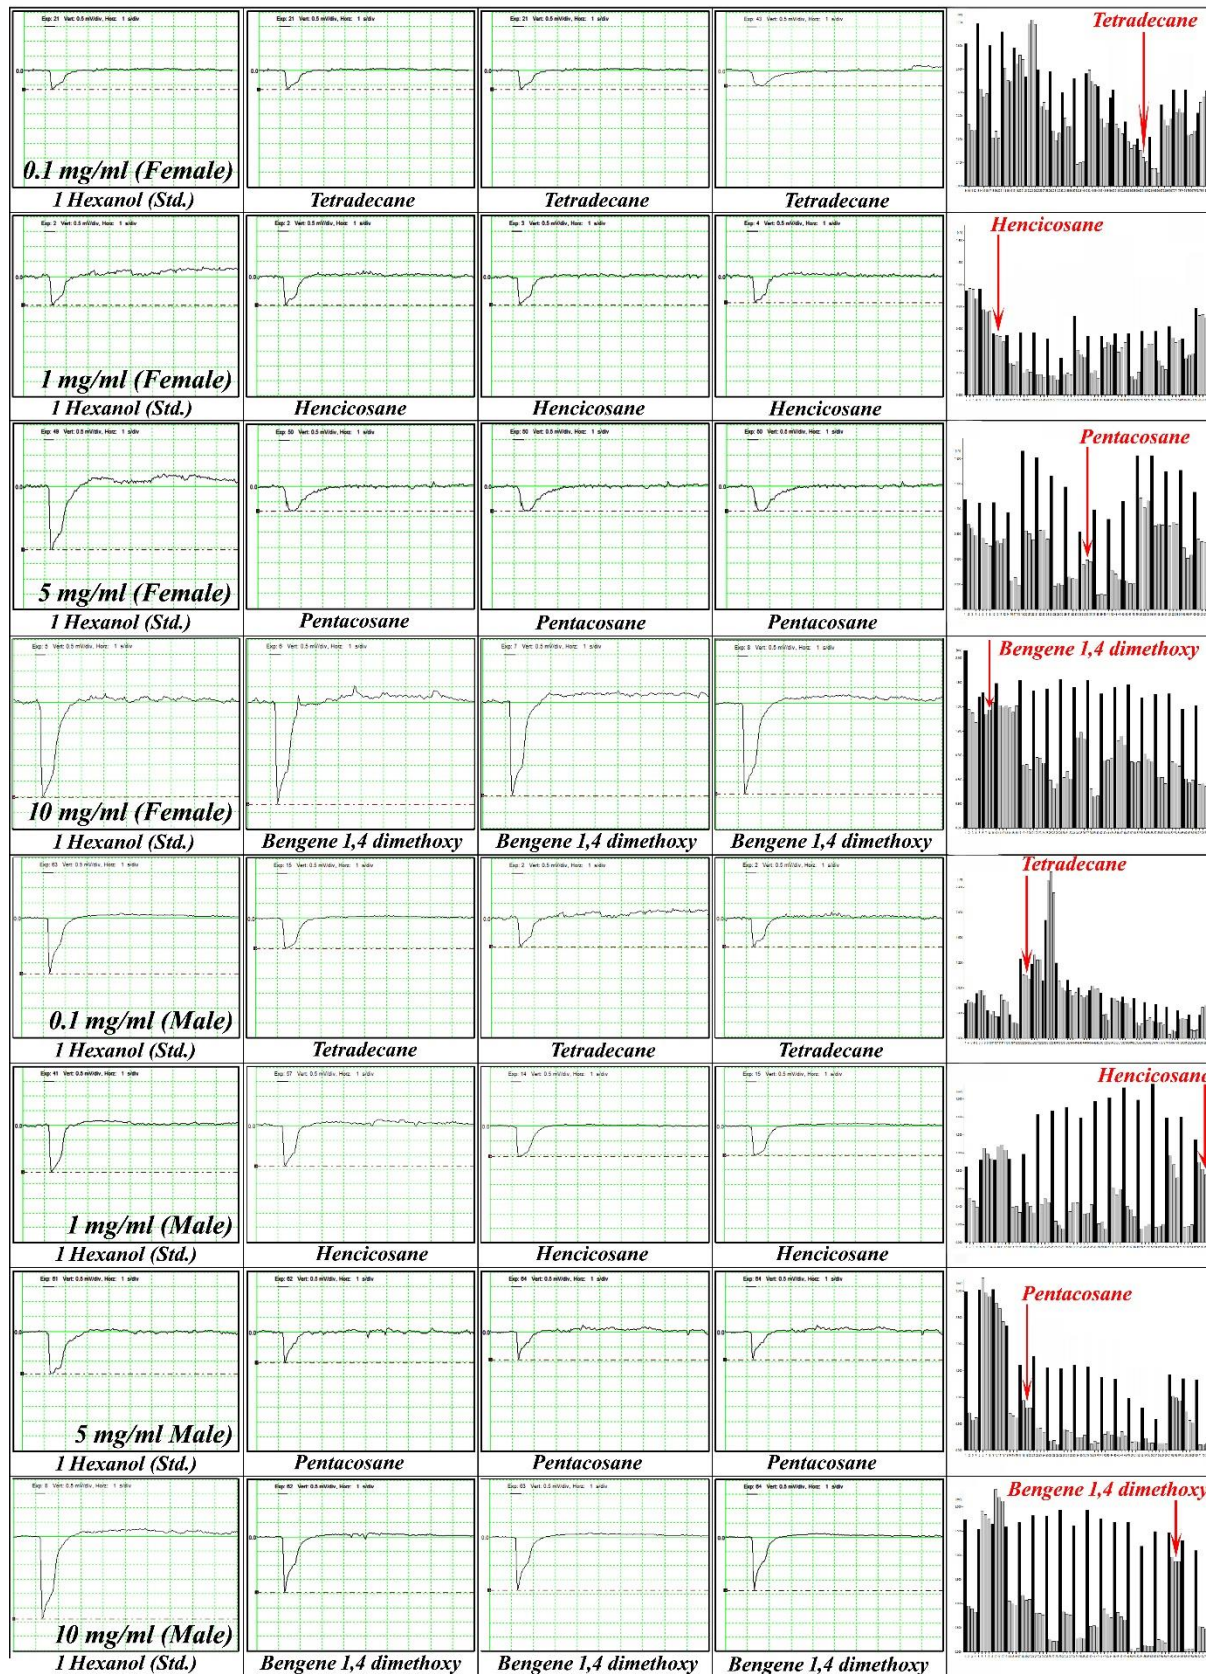

Fig. S3

Figure S2. Representative raw data of EAG spectra measured in mV of few stimulated odorant.

| <b>Table S1. List of chemical compounds used for EAG.</b> |               |                             |
|-----------------------------------------------------------|---------------|-----------------------------|
| <b>List of Compounds</b>                                  | <b>purity</b> | <b>Supplier</b>             |
| <i>Green Leaf volatile (GLV)</i>                          |               |                             |
| Trans-2-Hexenal                                           | ≥ 95%         | Sigma-Aldrich               |
| cis-3-Hexen-1-ol                                          | 97%           | Sigma-Aldrich               |
| Trans-2-hexenyl acetate                                   | 98%           | Sigma-Aldrich               |
| Hexanal                                                   | 98%           | Sigma-Aldrich               |
| <b>Decanal</b>                                            | ≥ 98%         | Sigma-Aldrich               |
| <i>Aliphatic</i>                                          |               |                             |
| 1-Hexanol                                                 | 99%           | Sigma                       |
| 1-Pentanol                                                | 99%           | Aldrich                     |
| Hexyl acetate                                             | 99%           | Sigma-Aldrich               |
| trans-2-hexen-1-ol                                        | 96%           | Aldrich                     |
| 1-Octen-3-ol                                              | ≥ 98%         | Aldrich                     |
| 1-Heptanol                                                | 98%           | Aldrich                     |
| 1-Hepten-3-ol                                             | ≥ 98%         | Aldrich                     |
| 2-Nonanone                                                | ≥ 99%         | Aldrich                     |
| <b>Nonanal</b>                                            | 95 %          | Sigma-Aldrich               |
| 2 Heptanone                                               | 99%           | Sigma-Aldrich               |
| <b>Nonadecane</b>                                         | 99%           | Sigma-Aldrich               |
| <b>Tetradecane</b>                                        | ≥99%          | Sigma-Aldrich               |
| <b>Pentacosane</b>                                        | 99%           | Sigma-Aldrich               |
| <b>Eicosane</b>                                           | 99%           | Sigma-Aldrich               |
| <b>Heptadecane</b>                                        | 99%           | Sigma-Aldrich               |
| Cis-jasmone                                               | > 95%         | S H Kelkar & Co.,<br>Mumbai |
| 3- Methyl butanol                                         | ≥99%          | Sigma-Aldrich               |
| Acetic acid                                               | ≥ 99.7%       | Sigma-Aldrich               |
| 3 Hydroxy-2-butanone                                      | ≥ 99%         | Sigma-Aldrich               |
| Heptanoic acid                                            | ≥ 99%         | Sigma-Aldrich               |
| Nonanoic acid                                             | ≥ 97%         | Sigma-Aldrich               |

|                                                                        |       |               |
|------------------------------------------------------------------------|-------|---------------|
| Hexanoic acid                                                          | ≥ 99% | Sigma-Aldrich |
| Butyric acid                                                           | ≥99%  | Sigma-Aldrich |
| 6-methyl-5-hepten-2-one                                                | 99%   | Sigma-Aldrich |
| 2,3-Butanedione                                                        | 97%   | Sigma-Aldrich |
| Heptane                                                                | 99%   | Sigma-Aldrich |
| <i>Aromatic</i>                                                        |       |               |
| Benzyl alcohol                                                         | ≥99%  | Sigma-Aldrich |
| Acetophenone                                                           | 98%   | Fluka         |
| <b>Benzaldehyde</b>                                                    | 99%   | Fluka         |
| Phenacetaldehyde                                                       | > 50% | Fluka         |
| Isoeugenol                                                             | 98%   | Aldrich       |
| Phenethyl alcohol                                                      | ≥ 99% | Aldrich       |
| 2 methyl phenol                                                        | 97%   | Sigma-Aldrich |
| 3-methyl phenol                                                        | 99%   | Sigma-Aldrich |
| Ethyl benzoate                                                         | ≥99%  | Sigma-Aldrich |
| 4-methyl phenol                                                        | 99%   | Sigma-Aldrich |
| <b>1,4 Dimethoxybenzene</b>                                            | 99%   | Sigma-Aldrich |
| <b>Ethyl benzene</b>                                                   | 99%   | Sigma-Aldrich |
| <i>Oxygenated monoterpenes</i>                                         |       |               |
| Geraniol                                                               | ~ 98% | Sigma-Aldrich |
| <b>Phytol</b>                                                          | 97%   | Sigma-Aldrich |
| β-Citronellal                                                          | ≥ 95% | Sigma-Aldrich |
| <b>Eucalyptol</b>                                                      | 99%   | Sigma-Aldrich |
| <i>Sesquiterpenes</i>                                                  |       |               |
| α- Humulene                                                            | ≥96%  | Sigma-Aldrich |
| <i>Hydrocarbon monoterpenes</i>                                        |       |               |
| <b>D (+)-Limonene</b>                                                  | ≥ 97% | Sigma-Aldrich |
| <b>(1S)- (-)-α-pinene</b>                                              | ≥ 81% | Sigma-Aldrich |
| Compounds in bold are present in the <i>C. maxima</i> volatile extract |       |               |

| <b>Table S2: Dose-dependent EAG amplitude (relative mean amplitude in %) of individual compound from different chemical classes in female <i>Aulacophora foveicollis</i>. Compounds in bold are present in the <i>C. maxima</i> volatile extract.</b> |            |            |               |             |
|-------------------------------------------------------------------------------------------------------------------------------------------------------------------------------------------------------------------------------------------------------|------------|------------|---------------|-------------|
|                                                                                                                                                                                                                                                       | 0.1mg/mL   | 1mg/mL     | 5 mg/mL       | 10 mg/mL    |
| <i>Green Leaf volatiles (GLV)</i>                                                                                                                                                                                                                     |            |            |               |             |
| Trans-2-Hexenal                                                                                                                                                                                                                                       | 51.95±1.26 | 73.84±2.52 | 61.052±1.64   | 57.59±1.17  |
| cis-3-Hexen-1-ol                                                                                                                                                                                                                                      | 67.06±1.11 | 94.45±0.39 | 113.4±1.23    | 103.32±1.89 |
| Trans-2-hexenyl acetate                                                                                                                                                                                                                               | 45.25±1.86 | 71.52±2.60 | 60.558±1.93   | 64.13±1.73  |
| Hexanal                                                                                                                                                                                                                                               | 82.68±6.95 | 72.80±1.61 | 60.363±1.61   | 68.63±0.56  |
| <b>Decanal</b>                                                                                                                                                                                                                                        | 17.80±0.13 | 29.15±2.63 | 68.363±2.46   | 96.84±1.62  |
| <i>Aliphatic compounds</i>                                                                                                                                                                                                                            |            |            |               |             |
| 1-Pentanol                                                                                                                                                                                                                                            | 57.67±1.04 | 71.45±2.56 | 72.005±2.08   | 97.68±2.02  |
| Hexyl acetate                                                                                                                                                                                                                                         | 61.50±5.13 | 43.53±1.18 | 48.596±0.99   | 76.09±1.93  |
| Trans-2-Hexen-1-ol                                                                                                                                                                                                                                    | 65.68±0.84 | 90.48±1.16 | 119.2±1.87    | 86.62±2.47  |
| 1-Octene-3-ol                                                                                                                                                                                                                                         | 46.89±1.27 | 12.25±0.94 | 77.656±3.08   | 98.93±6.14  |
| 1-Heptanol                                                                                                                                                                                                                                            | 88.45±1.07 | 85.75±1.97 | 90.523±1.96   | 102.50±0.85 |
| 1-hepten-3-ol                                                                                                                                                                                                                                         | 76.85±2.39 | 76.05±2.98 | 63.126±2.10   | 84.33±0.43  |
| 2-Nonanone                                                                                                                                                                                                                                            | 29.65±0.61 | 19.13±0.71 | 52.645±1.84   | 41.74±1.02  |
| <b>Nonanal</b>                                                                                                                                                                                                                                        | 63.20±2.67 | 31.00±1.83 | 38.699±2.9128 | 62.22±1.78  |
| 2-Heptanone                                                                                                                                                                                                                                           | 45.57±1.05 | 16.53±0.72 | 50.165±1.93   | 49.94±1.35  |
| <b>Nonadecane</b>                                                                                                                                                                                                                                     | 51.72±2.11 | 41.29±2.01 | 66.21±1.82    | 96.96±1.82  |
| <b>Tetradecane</b>                                                                                                                                                                                                                                    | 40.21±1.11 | 31.29±1.11 | 69.0±2.32     | 89.31±1.62  |
| <b>Pentacosane</b>                                                                                                                                                                                                                                    | 44.69±2.11 | 39.72±1.11 | 80.79±1.78    | 95.21±2.11  |
| <b>Heneicosane</b>                                                                                                                                                                                                                                    | 50.26±1.21 | 39.29±0.96 | 79.21±1.21    | 100.21±2.32 |
| <b>Eicosane</b>                                                                                                                                                                                                                                       | 41.21±1.99 | 52.32±1.62 | 60.7±0.79     | 78.21±1.21  |
| <b>Heptadecane</b>                                                                                                                                                                                                                                    | 39.72±1.72 | 41.72±1.32 | 63.79±2.32    | 65.10±1.72  |
| Cis-jasmone                                                                                                                                                                                                                                           | 33.71±1.92 | 24.51±0.64 | 61.382±1.33   | 52.85±0.70  |
| 3-Methyl butanol                                                                                                                                                                                                                                      | 32.88±1.24 | 46.41±1.57 | 64.306±1.30   | 82.77±1.33  |
| Acetic acid                                                                                                                                                                                                                                           | 15.45±1.31 | 28.25±0.49 | 22.69±0.700   | 23.60±1.19  |
| Lactic acid                                                                                                                                                                                                                                           | 21.79±0.77 | 24.43±2.21 | 69.841±1.295  | 8.76±1.17   |
| 3-Hydroxy-2-butanone                                                                                                                                                                                                                                  | 26.44±1.06 | 12.38±1.39 | 15.063±0.22   | 23.35±1.69  |
| Heptanoic acid                                                                                                                                                                                                                                        | 95.57±4.09 | 52.56±0.30 | 44.698±1.58   | 51.70±0.99  |
| Nonanoic acid                                                                                                                                                                                                                                         | 28.46±4.23 | 58.82±2.85 | 77.916±1.87   | 30.03±0.89  |
| Hexanoic acid                                                                                                                                                                                                                                         | 63.47±2.55 | 80.76±2.07 | 57.502±1.69   | 42.08±1.37  |

|                                 |            |            |               |             |
|---------------------------------|------------|------------|---------------|-------------|
| Butyric acid                    | 33.56±1.64 | 35.80±0.80 | 24.985±0.90   | 22.65±0.77  |
| 6-methyl-5-hepten-2-one         | 41.05±2.07 | 28.50±0.98 | 29.515±2.22   | 29.49±2.46  |
| 2,3-Butanedione                 | 65.79±3.29 | 16.87±0.38 | 25.693±0.50   | 35.13±1.53  |
| Heptane                         | 38.54±1.49 | 16.65±0.03 | 33.492±2.07   | 37.64±2.88  |
| <i>Aromatics compounds</i>      |            |            |               |             |
| Benzyl alcohol                  | 74.59±2.80 | 66.76±2.34 | 92.713±0.98   | 100.99±1.83 |
| Acetophenone                    | 38.05±2.37 | 49.51±1.66 | 42.778±1.18   | 65.17±1.49  |
| <b>Benzaldehyde</b>             | 55.14±0.98 | 31.10±1.00 | 22.242±0.51   | 51.06±0.56  |
| Phenylacetaldehyde              | 44.73±0.09 | 44.43±1.49 | 62.036±1.79   | 53.75±1.84  |
| Isoeugenol                      | 38.44±1.95 | 37.23±1.41 | 40.048±2.25   | 40.08±0.99  |
| Phenethyl alcohol               | 76.00±1.22 | 75.85±1.29 | 107.04±2.0328 | 119.37±1.09 |
| 2 methyl phenol                 | 30.26±1.19 | 23.76±0.69 | 102.05±0.6878 | 136.51±0.97 |
| 3-methyl phenol                 | 76.19±2.38 | 72.30±2.06 | 100.37±1.7913 | 120.08±2.26 |
| Ethyl benzoate                  | 24.76±2.49 | 38.40±0.98 | 34.253±0.2214 | 62.87±2.05  |
| 4-methyl phenol                 | 7.71±0.75  | 28.18±0.54 | 88.905±0.73   | 66.49±1.59  |
| <b>1,4 dimethoxy benzene</b>    | 69.16±1.11 | 95.50±0.49 | 122.4±1.23    | 119.82±1.89 |
| <b>Ethyl benzene</b>            | 61.71±1.09 | 50.43±1.29 | 80.76±1.11    | 100.51±1.21 |
| <i>Oxygenated monoterpenes</i>  |            |            |               |             |
| <b>Phytol</b>                   | 45.00±1.61 | 39.27±1.61 | 91.473±2.310  | 48.93±0.08  |
| Geraniol                        | 33.93±0.41 | 19.41±0.77 | 55.062±1.242  | 53.95±2.42  |
| β-Citronellal                   | 35.46±0.93 | 36.95±1.48 | 56.83±1.51    | 79.30±1.00  |
| <b>Eucalyptol</b>               | 34.32±0.81 | 39.21±1.31 | 61.83±1.41    | 76.13±1.92  |
| <i>Sesquiterpenes</i>           |            |            |               |             |
| a- Humulene                     | 31.75±1.51 | 38.17±1.37 | 51.08±0.387   | 12.20±0.46  |
| <i>Hydrocarbon monoterpenes</i> |            |            |               |             |
| <b>D(+)-Limonene</b>            | 26.43±0.72 | 34.68±0.76 | 58.39±0.8718  | 35.20±0.57  |
| <b>(1S)-(-)-α-pinene</b>        | 29.89±0.72 | 27.04±2.12 | 79.517±2.96   | 55.48±1.35  |

**Table S3: Dose-dependent EAG amplitude (relative mean amplitude in %) of individual compound from different chemical classes in male *Aulacophora foveicollis*. Compounds in bold are present in the *C. maxima* volatile extract**

| Compounds                         | 0.1mg/mL   | 1mg/mL      | 5 mg/mL     | 10 mg/mL    |
|-----------------------------------|------------|-------------|-------------|-------------|
| <i>Green Leaf volatiles (GLV)</i> |            |             |             |             |
| Trans-2-Hexenal                   | 49.21±2.24 | 53.06±2.43  | 21.34±3.24  | 32.53±1.44  |
| cis-3-Hexen-1-ol                  | 62.33±3.34 | 94.95±2.46  | 86.5±3.34   | 121.70±2.44 |
| Trans-2-hexenyl acetate           | 68.83±2.08 | 40.84±3.05  | 28.0±2.18   | 39.06±0.88  |
| Hexanal                           | 70.05±1.73 | 31.80±2.79  | 16.6±1.63   | 28.07±2.73  |
| <b>Decanal</b>                    | 22.97±0.87 | 10.96±1.42  | 17.47±0.77  | 33.55±4.84  |
| <i>Aliphatic compounds</i>        |            |             |             |             |
| 1-Pentanol                        | 57.64±0.33 | 61.53±0.39  | 52.53±0.43  | 76.87±1.34  |
| Hexyl acetate                     | 44.54±1.71 | 39.91±2.41  | 33.4±1.41   | 41.40±2.71  |
| Trans-2-Hexen-1-ol                | 65.17±1.80 | 108.46±2.89 | 116.1±1.60  | 111.70±2.80 |
| 1-Octene-3-ol                     | 34.84±2.3  | 13.34±1.83  | 9.27±2.38   | 2.82±3.30   |
| 1-Heptanol                        | 68.91±1.02 | 102.99±2.03 | 111.57±1.22 | 94.82±4.02  |
| 1-hepten-3-ol                     | 63.28±1.82 | 103.27±2.86 | 116.01±1.22 | 126.11±2.82 |
| 2-Nonanone                        | 35.75±3.90 | 49.32±1.99  | 66.94±3.60  | 55.28±4.90  |
| <b>Nonanal</b>                    | 39.78±1.05 | 18.65±2.04  | 31.93±1.25  | 45.40±1.48  |
| 2-Heptanone                       | 22.36±1.31 | 19.44±2.36  | 31.10±1.21  | 33.23±2.31  |
| <b>Nonadecane</b>                 | 66.21±1.55 | 80.29±1.55  | 105.0±2.11  | 100.21±1.33 |
| <b>Tetradecane</b>                | 60.72±0.62 | 87.60±2.11  | 97.32±1.78  | 106.92±1.99 |
| <b>Pentacosane</b>                | 62.71±1.72 | 82.32±2.31  | 90.21±1.72  | 100.11±1.11 |
| <b>Heneicosane</b>                | 65.00±1.72 | 101.21±1.21 | 129.3±1.99  | 111.99±1.81 |
| <b>Eicosane</b>                   | 49.99±2.01 | 52.96±2.01  | 62.9±1.11   | 82.40±1.48  |
| <b>Heptadecane</b>                | 50.32±0.88 | 72.89±0.99  | 81.3±1.98   | 78.62±1.32  |
| Cis-jasmone                       | 18.71±1.05 | 17.45±1.15  | 6.37±1.45   | 11.59±4.05  |
| 3-Methyl butanol                  | 42.19±2.62 | 21.28±2.24  | 51.62±2.62  | 40.97±3.62  |
| Acetic acid                       | 19.50±1.30 | 11.65±3.48  | 11.59±1.40  | 2.48±1.38   |
| 3-Hydroxy-2-butanone              | 22.22±0.56 | 10.68±1.22  | 10.71±0.66  | 3.31±2.56   |
| Heptanoic acid                    | 77.03±4.01 | 27.35±0.26  | 16.9±4.21   | 27.18±0.01  |
| Nonanoic acid                     | 51.90±2.82 | 35.83±2.64  | 16.0±7.22   | 18.34±2.82  |
| Hexanoic acid                     | 55.67±3.9  | 25.86±0.32  | 13.0±3.29   | 27.64±6.90  |
| Butyric acid                      | 36.27±2.39 | 14.31±3.32  | 7.3±2.39    | 11.31±1.39  |
| 6-methyl-5-hepten-2-one           | 22.49±3.56 | 19.73±4.57  | 32.30±3.46  | 16.23±3.76  |

|                                 |            |            |            |             |
|---------------------------------|------------|------------|------------|-------------|
| 2,3-Butanedione                 | 55.84±1.78 | 13.09±6.72 | 29.30±1.68 | 18.99±1.28  |
| Heptane                         | 15.41±3.73 | 15.09±3.02 | 3.67±3.43  | 7.10±3.78   |
| <i>Aromatics compounds</i>      |            |            |            |             |
| Benzyl alcohol                  | 64.99±1.53 | 52.14±2.61 | 71.35±1.43 | 80.25±1.23  |
| Acetophenone                    | 37.62±4.07 | 15.69±4.02 | 31.54±4.47 | 35.49±4.57  |
| <b>Benzaldehyde</b>             | 27.11±3.94 | 13.60±0.48 | 29.16±6.84 | 26.07±2.24  |
| Phenylacetaldehyde              | 29.43±3.05 | 15.92±3.03 | 15.46±5.25 | 35.88±1.05  |
| Isoeugenol                      | 21.62±1.00 | 7.83±2.08  | 14.67±1.20 | 29.39±1.08  |
| Phenethyl alcohol               | 46.31±2.94 | 51.68±0.86 | 73.05±6.24 | 81.50±2.82  |
| 2 methyl phenol                 | 20.01±5.54 | 26.90±3.52 | 78.10±5.34 | 92.07±5.24  |
| 3-methyl phenol                 | 39.57±2.54 | 46.70±4.42 | 75.56±2.34 | 86.30±1.58  |
| Ethyl benzoate                  | 27.43±5.90 | 21.05±3.04 | 11.05±5.40 | 21.52±5.96  |
| 4-methyl phenol                 | 25.81±2.13 | 19.76±4.12 | 10.36±6.43 | 10.47±4.13  |
| <b>Benzene 1,4 dimethoxy</b>    | 62.99±1.02 | 69.14±0.61 | 80.25±1.11 | 100.50±1.25 |
| <b>Ethyl benzene</b>            | 40.20±0.3  | 46.70±1.11 | 69.00±1.39 | 26.40±1.31  |
| <i>Oxygenated monoterpenes</i>  |            |            |            |             |
| Geraniol                        | 29.25±1.54 | 22.55±3.48 | 67.58±1.34 | 27.67±2.54  |
| <b>Phytol</b>                   | 12.04±2.90 | 10.40±2.28 | 86.50±2.70 | 11.86±4.90  |
| β-Citronellal                   | 18.87±2.09 | 21.43±2.06 | 69.53±2.29 | 15.88±3.09  |
| <b>Eucalyptol</b>               | 26.84±1.11 | 40.21±0.99 | 51.83±1.21 | 59.21±1.32  |
| <i>Sesquiterpenes</i>           |            |            |            |             |
| α- Humulene                     | 23.04±1.30 | 13.68±1.22 | 77.48±1.80 | 8.46±1.40   |
| <i>Hydrocarbon monoterpenes</i> |            |            |            |             |
| <b>D(+)-Limonene</b>            | 20.70±1.36 | 13.22±2.58 | 10.80±1.56 | 28.54±1.66  |
| <b>(1S)-(-)-α-pinene</b>        | 33.01±2.30 | 24.69±2.63 | 58.94±1.30 | 15.09±1.90  |



| Table S4: Representation of two-way ANOVA and post hoc tests analysis                                                                                                         |                         |                         |                |          |                  |                     |
|-------------------------------------------------------------------------------------------------------------------------------------------------------------------------------|-------------------------|-------------------------|----------------|----------|------------------|---------------------|
| A Between-Subjects Factors                                                                                                                                                    |                         |                         |                |          |                  |                     |
|                                                                                                                                                                               |                         | Value Label             |                | N        |                  |                     |
| Gender                                                                                                                                                                        | 1                       | Male                    |                | 200      |                  |                     |
|                                                                                                                                                                               | 2                       | Female                  |                | 200      |                  |                     |
| Concentration                                                                                                                                                                 | 1                       | 0.1 mg/mL concentration |                | 100      |                  |                     |
|                                                                                                                                                                               | 2                       | 1 mg/mL concentration   |                | 100      |                  |                     |
|                                                                                                                                                                               | 3                       | 5 mg/mL concentration   |                | 100      |                  |                     |
|                                                                                                                                                                               | 4                       | 10 mg/mL concentration  |                | 100      |                  |                     |
| Levene's Test of Equality of Error Variances <sup>a</sup><br>Dependent Variable: Score Amplitude                                                                              |                         |                         |                |          |                  |                     |
| F-value                                                                                                                                                                       | Degrees of freedom (df) | p value (p<0.05)        |                |          |                  |                     |
| 3.958                                                                                                                                                                         | 7                       | 0                       |                |          |                  |                     |
|                                                                                                                                                                               | 392                     |                         |                |          |                  |                     |
| Tests the null hypothesis that the error variance of the dependent variable is equal across groups.<br>a. Design: Intercept + Gender + Concentration + Gender * Concentration |                         |                         |                |          |                  |                     |
| B Descriptive Statistics                                                                                                                                                      |                         |                         |                |          |                  |                     |
| Dependent Variable: Score Amplitude                                                                                                                                           |                         |                         |                |          |                  |                     |
| Gender                                                                                                                                                                        | Concentration           | Mean                    | Std. Deviation | N        |                  |                     |
| Male                                                                                                                                                                          | 0.1 mg/mL concentration | 5.8518                  | 1.46808        | 50       |                  |                     |
|                                                                                                                                                                               | 1 mg/mL concentration   | 5.0034                  | 2.07574        | 50       |                  |                     |
|                                                                                                                                                                               | 5 mg/mL concentration   | 5.972                   | 2.42685        | 50       |                  |                     |
|                                                                                                                                                                               | 10 mg/mL concentration  | 5.4352                  | 2.52617        | 50       |                  |                     |
|                                                                                                                                                                               | Total                   | 5.5656                  | 2.1815         | 200      |                  |                     |
| Female                                                                                                                                                                        | 0.1 mg/mL concentration | 6.5502                  | 1.50053        | 50       |                  |                     |
|                                                                                                                                                                               | 1 mg/mL concentration   | 6.2122                  | 1.76869        | 50       |                  |                     |
|                                                                                                                                                                               | 5 mg/mL concentration   | 7.6254                  | 1.66642        | 50       |                  |                     |
|                                                                                                                                                                               | 10 mg/mL concentration  | 7.422                   | 1.97154        | 50       |                  |                     |
|                                                                                                                                                                               | Total                   | 6.9524                  | 1.82019        | 200      |                  |                     |
| Total                                                                                                                                                                         | 0.1 mg/mL concentration | 6.201                   | 1.518          | 100      |                  |                     |
|                                                                                                                                                                               | 1 mg/mL concentration   | 5.6078                  | 2.01244        | 100      |                  |                     |
|                                                                                                                                                                               | 5 mg/mL concentration   | 6.7987                  | 2.23156        | 100      |                  |                     |
|                                                                                                                                                                               | 10 mg/mL concentration  | 6.4286                  | 2.46561        | 100      |                  |                     |
|                                                                                                                                                                               | Total                   | 6.259                   | 2.12319        | 400      |                  |                     |
| C Tests of Between-Subjects Effects                                                                                                                                           |                         |                         |                |          |                  |                     |
| Dependent Variable: Score Amplitude                                                                                                                                           |                         |                         |                |          |                  |                     |
| Source                                                                                                                                                                        | Type III Sum of Squares | df                      | Mean Square    | F-value  | p value (p<0.05) | Partial Eta Squared |
| Corrected Model                                                                                                                                                               | 290.498a                | 7                       | 41.5           | 10.787   | 0                | 0.162               |
| Intercept                                                                                                                                                                     | 15670.158               | 1                       | 15670.158      | 4.07E+03 | 0                | 0.912               |
| Gender                                                                                                                                                                        | 192.335                 | 1                       | 192.335        | 49.991   | 0                | 0.113               |

|                                                                                                                                                     |                         |                 |             |         |                                                     |                     |
|-----------------------------------------------------------------------------------------------------------------------------------------------------|-------------------------|-----------------|-------------|---------|-----------------------------------------------------|---------------------|
| Concentration                                                                                                                                       | 74.747                  | 3               | 24.916      | 6.476   | 0                                                   | 0.047               |
| Gender × Concentration                                                                                                                              | 23.416                  | 3               | 7.805       | 2.029   | 0.109                                               | 0.015               |
| Error                                                                                                                                               | 1508.166                | 392             | 3.847       |         |                                                     |                     |
| Total                                                                                                                                               | 17468.821               | 400             |             |         |                                                     |                     |
| Corrected Total                                                                                                                                     | 1798.664                | 399             |             |         |                                                     |                     |
| a. R Squared = 0.162 (Adjusted R Squared = 0.147)                                                                                                   |                         |                 |             |         |                                                     |                     |
| <b>D Univariate Tests</b><br><b>Dependent Variable: Score Amplitude</b>                                                                             |                         |                 |             |         |                                                     |                     |
|                                                                                                                                                     | Sum of Squares          | df              | Mean Square | F-value | p value(p <0.05)                                    | Partial Eta Squared |
| Contrast                                                                                                                                            | 192.335                 | 1               | 192.335     | 49.991  | 0                                                   | 0.113               |
| Error                                                                                                                                               | 1508.166                | 392             | 3.847       |         |                                                     |                     |
| <b>E Pairwise Comparisons</b><br>Dependent Variable: Score_Amplitude                                                                                |                         |                 |             |         |                                                     |                     |
| Gender                                                                                                                                              | Gender                  | Mean Difference | Std. Error  | p value | 95% Confidence Interval for Difference <sup>a</sup> |                     |
|                                                                                                                                                     |                         |                 |             |         | Lower Bound                                         | Upper Bound         |
| Male                                                                                                                                                | Female                  | -1.387*         | 0.196       | 0       | -1.772                                              | -1.001              |
| Female                                                                                                                                              | Male                    | 1.387*          | 0.196       | 0       | 1.001                                               | 1.772               |
| Based on estimated marginal means<br>*. The mean difference is significant at the .05 level.<br>a. Adjustment for multiple comparisons: Bonferroni. |                         |                 |             |         |                                                     |                     |
| <b>F Post Hoc Tests (Concentration)</b><br><b>Multiple Comparisons of Score Amplitude</b><br><b>Tukey HSD</b>                                       |                         |                 |             |         |                                                     |                     |
| Concentration                                                                                                                                       | Concentration           | Mean Difference | Std. Error  | Sig.    | 95% Confidence Interval                             |                     |
|                                                                                                                                                     |                         |                 |             |         | Lower Bound                                         | Upper Bound         |
| 0.1 mg/mL concentration                                                                                                                             | 1 mg/mL concentration   | 0.5932          | 0.27739     | 0.143   | -0.1225                                             | 1.3089              |
|                                                                                                                                                     | 5 mg/mL concentration   | -0.5977         | 0.27739     | 0.138   | -1.3134                                             | 0.118               |
|                                                                                                                                                     | 10 mg/mL concentration  | -0.2276         | 0.27739     | 0.845   | -0.9433                                             | 0.4881              |
| 1 mg/mL concentration                                                                                                                               | 0.1 mg/mL concentration | -0.5932         | 0.27739     | 0.143   | -1.3089                                             | 0.1225              |
|                                                                                                                                                     | 5 mg/mL concentration   | -1.1909*        | 0.27739     | 0       | -1.9066                                             | -0.4752             |
|                                                                                                                                                     | 10 mg/mL concentration  | -0.8208*        | 0.27739     | 0.017   | -1.5365                                             | -0.1051             |
| 5 mg/mL concentration                                                                                                                               | 0.1 mg/mL concentration | 0.5977          | 0.27739     | 0.138   | -0.118                                              | 1.3134              |
|                                                                                                                                                     | 1 mg/mL concentration   | 1.1909*         | 0.27739     | 0       | 0.4752                                              | 1.9066              |
|                                                                                                                                                     | 10 mg/mL concentration  | 0.3701          | 0.27739     | 0.542   | -0.3456                                             | 1.0858              |
| 10 mg/mL concentration                                                                                                                              | 0.1 mg/mL concentration | 0.2276          | 0.27739     | 0.845   | -0.4881                                             | 0.9433              |
|                                                                                                                                                     | 1 mg/mL concentration   | .8208*          | 0.27739     | 0.017   | 0.1051                                              | 1.5365              |
|                                                                                                                                                     | 5 mg/mL concentration   | -0.3701         | 0.27739     | 0.542   | -1.0858                                             | 0.3456              |

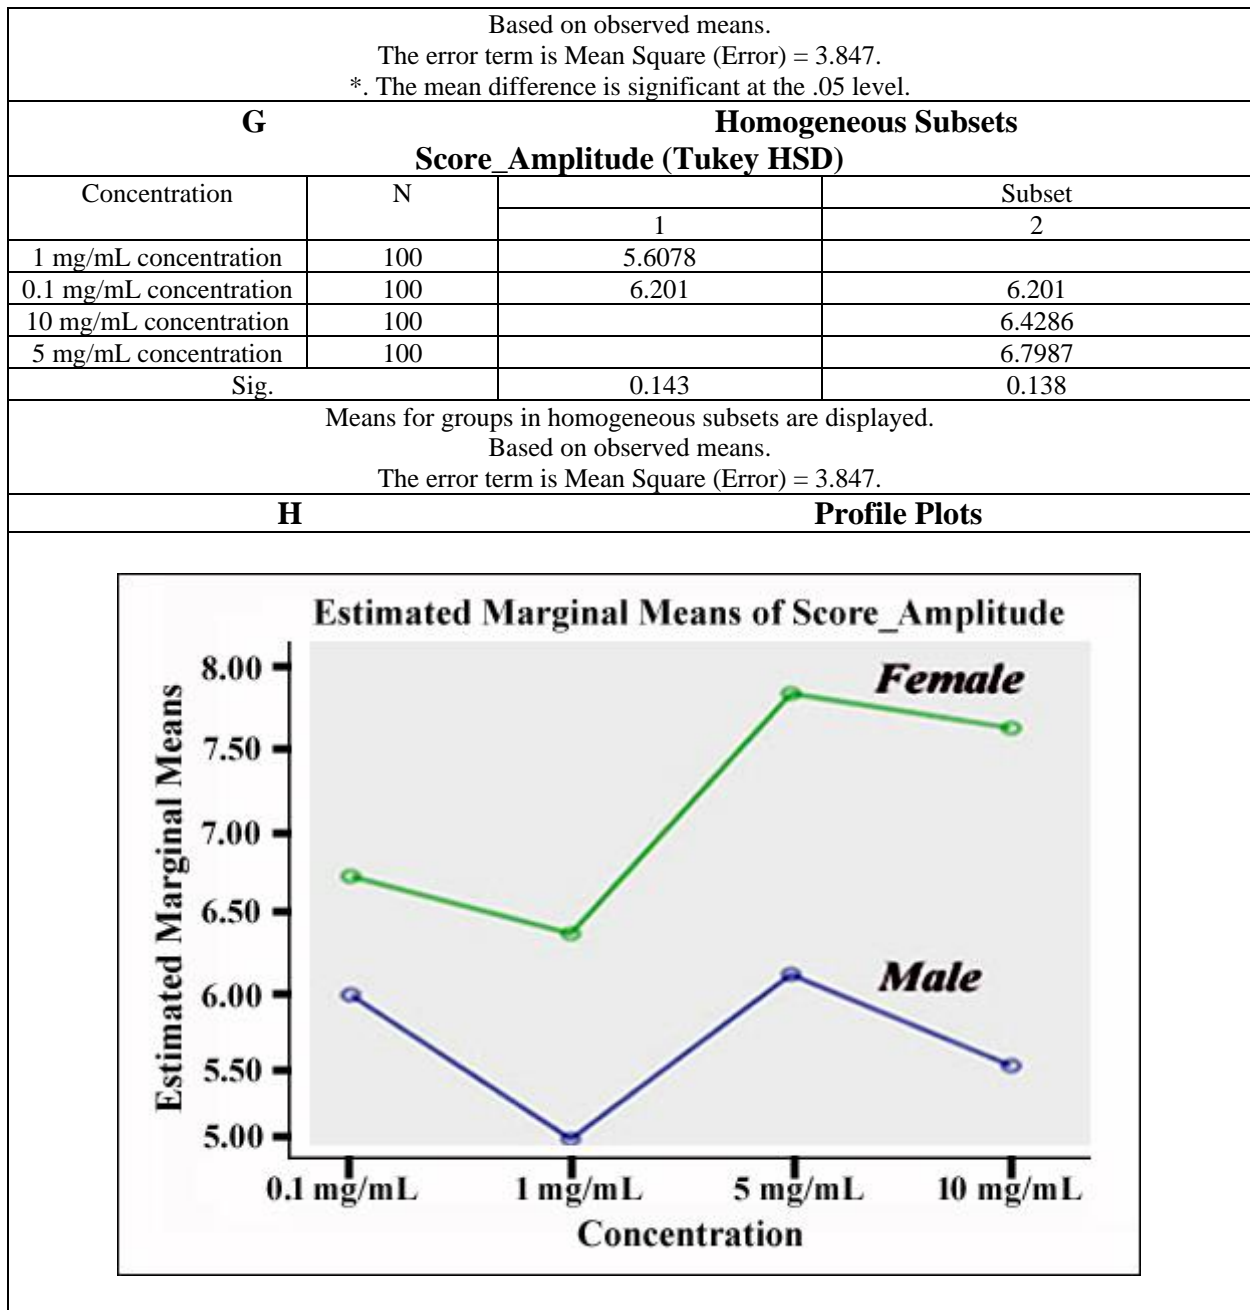

**Table S5: Y-tube bioassay<sup>a</sup> analysis in female and male *Aulacophora foveicollis***

| Compounds                  | Mean      |         |             | Standard deviation (SD) |         |             |
|----------------------------|-----------|---------|-------------|-------------------------|---------|-------------|
|                            | Treatment | Control | No response | Treatment               | Control | No response |
| <b>A. Female insects</b>   |           |         |             |                         |         |             |
| (1S)-(-)- $\alpha$ -pinene | 8.0       | -8.6    | 3.4         | 0.7                     | 1.1     | 1.1         |
| Decanal                    | 8.2       | -6.8    | 5           | 0.8                     | 0.8     | 0.7         |
| Phytol                     | 7.0       | -9.0    | 4           | 0.7                     | 0.7     | 1.0         |
| Nonanal                    | 8.4       | -7.8    | 3.8         | 0.5                     | 0.8     | 0.8         |
| 1,4 dimethoxybenzene       | 16.4      | -3.0    | 0.6         | 0.9                     | 0.7     | 0.5         |
| Heneicosane                | 14.4      | -3.4    | 2.2         | 0.5                     | 0.5     | 0.4         |
| Tetradecane                | 12.6      | -5.0    | 2.4         | 0.5                     | 0.7     | 0.5         |
| Pentacosane                | 13.4      | -4.4    | 2.2         | 0.5                     | 0.5     | 0.8         |
| Ethylbenzene               | 12.8      | -5.0    | 2.2         | 0.8                     | 0.7     | 1.3         |
| Benzaldehyde               | 6.0       | -10.0   | 4           | 0.7                     | 1.0     | 1.0         |
| D-limonene                 | 9.4       | -6.0    | 4.6         | 1.1                     | 0.7     | 1.3         |
| Nonadecane                 | 8.6       | -6.4    | 5           | 0.5                     | 0.9     | 1.2         |
| Eicosane                   | 8.6       | -7.0    | 4.4         | 0.5                     | 0.7     | 0.9         |
| <b>B. Male insects</b>     |           |         |             |                         |         |             |
| (1S)-(-)- $\alpha$ -pinene | 9.8       | -7.6    | 2.6         | 0.8                     | 0.9     | 0.9         |
| Decanal                    | 10.0      | -7.4    | 2.6         | 1.0                     | 0.5     | 0.9         |
| Phytol                     | 6.0       | -10.0   | 4           | 0.7                     | 1.0     | 0.7         |
| Nonanal                    | 8.2       | -7.0    | 4.8         | 0.8                     | 1.0     | 0.8         |
| 1,4 dimethoxybenzene       | 11.4      | -4.6    | 4           | 0.9                     | 0.5     | 0.7         |
| Heneicosane                | 13.0      | -4.0    | 3           | 0.7                     | 0.7     | 0.7         |
| Tetradecane                | 11.2      | -5.0    | 3.8         | 0.4                     | 1.0     | 0.8         |
| Pentacosane                | 11.2      | -5.4    | 3.4         | 0.8                     | 0.5     | 1.3         |
| Ethylbenzene               | 10.0      | -6.2    | 3.8         | 0.7                     | 0.8     | 1.3         |
| Benzaldehyde               | 5.0       | -11.0   | 4           | 1.0                     | 0.7     | 0.7         |
| D-limonene                 | 6.4       | -9.2    | 4.4         | 0.9                     | 0.8     | 1.1         |
| Nonadecane                 | 10.0      | -6.0    | 4           | 1.2                     | 0.7     | 1.7         |
| Eicosane                   | 9.0       | -7.6    | 3.4         | 0.7                     | 0.5     | 0.5         |

<sup>a</sup>Total five replications were taken and twenty insects consisted per replication. Thus the mean value of responses of each compound (0.1 mg/mL) is an average of 100 insects. All the data were transformed using square root transformation before analysis.
